# Supplementary material
Source: publisher figshare collection journal article supplement (https://acs.figshare.com/ndownloader/files/5671059)
Supplement: Supplementary file 1 [file 5671059]

Supporting Information for the paper

**Interaction of Chicken Liver Basic Fatty Acid Binding Protein with  
Fatty Acids: A  $^{13}\text{C}$  NMR and Fluorescence Study**

By Tiziana Beringhelli, Luca Goldoni, Stefano Capaldi, Alessandra Bossi,  
Massimiliano Perduca, and Hugo L. Monaco.

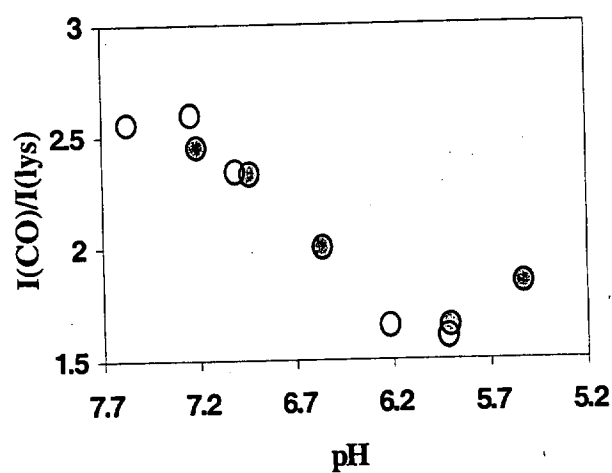

**Figure S1.** pH dependence of the integrated intensity of the  $^{13}\text{C}$  carboxylic resonance (300 K, 75.4 MHz) of OA bound to chicken Lb-FABP. Closed circles: titration from neutral to acidic pH, open circles: backtitration from acidic to neutral pH.

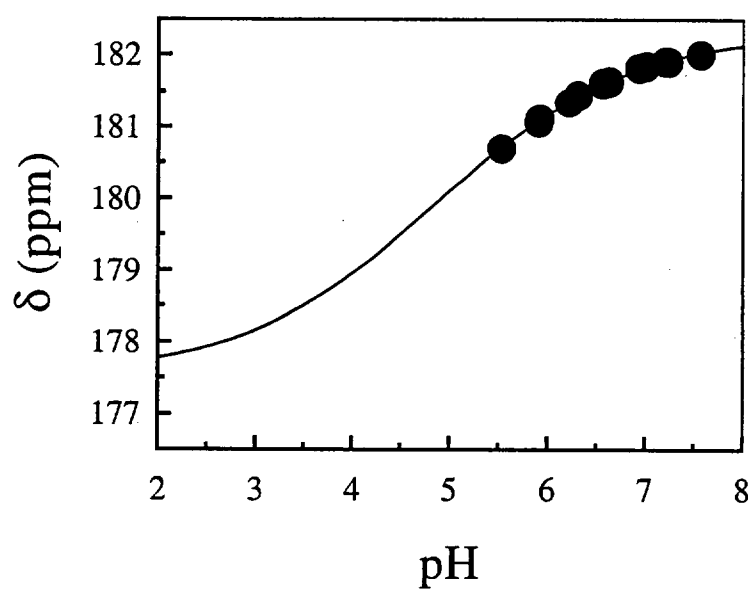

**Figure S2.** Henderson-Hasselbach fitting of the pH dependence of the bound oleate chemical shift as obtained. The solid line represents the curve fit obtained with the program KyPlot™.
